# Supplementary material for: Probiotic-fermented black tartary buckwheat alleviates hyperlipidemia and gut microbiota dysbiosis in rats fed with a high-fat diet
Source: Royal Society of Chemistry journal article supplement (doi:10.1039/d1fo00892g), 2021-01-01
Supplement: d1fo00892g1.pdf [file d1fo00892g1.pdf]

Figure S1. The body weight (A) and food intake (B) were recorded once a week at the end of the week.

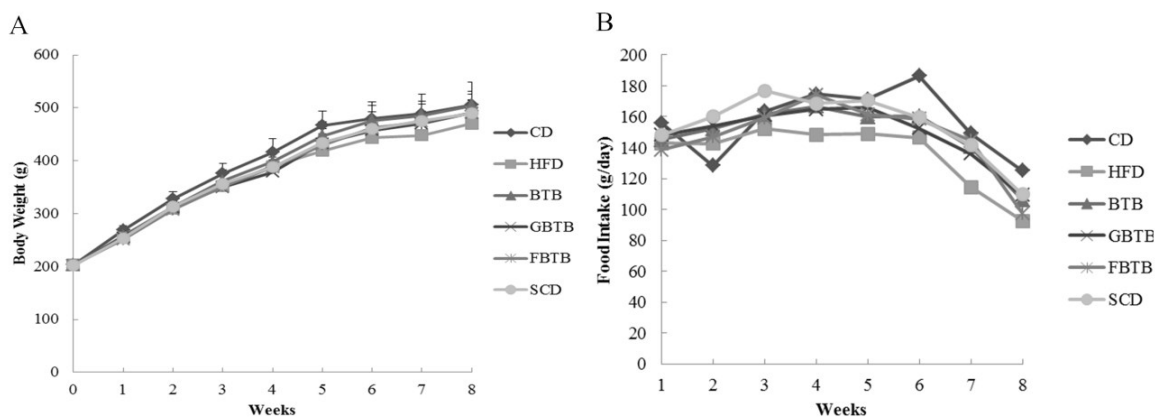

Figure S2. Alpha diversity and beta diversity of the gut microbiota from each sample. (A) Rarefaction curve, (B) Rank-Abundance curve.

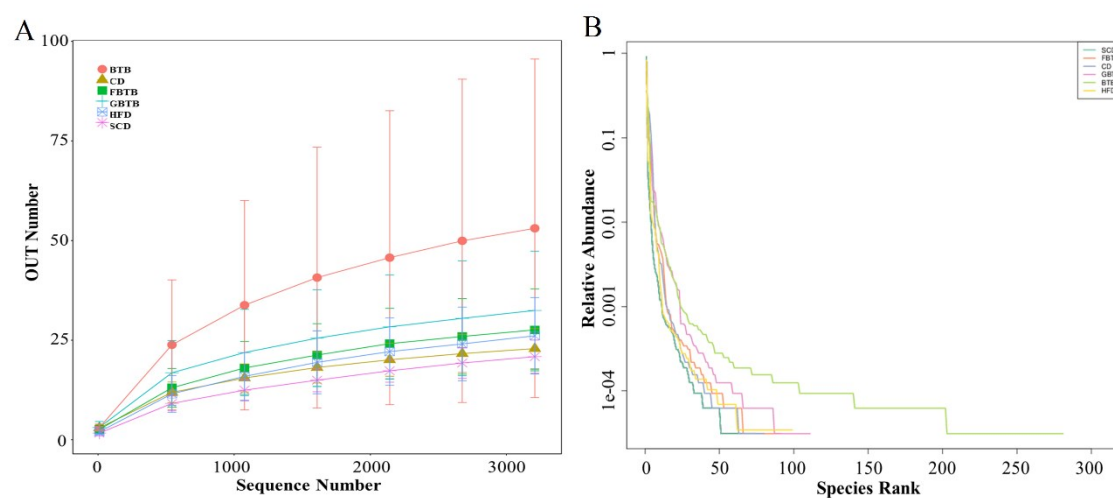

Table S1. Changes of amino acid content in BTB, GBTB, and FBTB (g/100 g).

| Tested material | BTB  | GBTB | FBTB |
|-----------------|------|------|------|
| ASP             | 1.29 | 1.09 | 1.10 |
| THR             | 0.51 | 0.46 | 0.46 |
| SER             | 0.67 | 0.64 | 0.62 |
| GLU             | 2.42 | 1.99 | 1.89 |
| GLY             | 0.76 | 0.61 | 0.60 |
| ALA             | 0.30 | 0.56 | 0.56 |
| VAL             | 0.75 | 0.59 | 0.61 |
| MET             | 0.18 | 0.15 | 0.14 |
| ILE             | 0.55 | 0.50 | 0.52 |
| LEU             | 0.88 | 0.81 | 0.83 |
| TYR             | 0.19 | 0.29 | 0.30 |
| PHE             | 0.63 | 0.59 | 0.61 |
| HIS             | 0.35 | 0.30 | 0.31 |
| LYS             | 0.61 | 0.71 | 0.69 |
| ARG             | 1.04 | 1.04 | 1.00 |
| PRO             | 0.55 | 0.41 | 0.41 |

Table S2. Concentration of SCFAs ( $\mu\text{g/mL}$ ) in colon contents.

| Groups          | CD                 | HFD                  | SCD                 | BTB                 | GBTB                 | FBTB                |
|-----------------|--------------------|----------------------|---------------------|---------------------|----------------------|---------------------|
| Acetic acid     | 83.76 $\pm$ 27.037 | 26.096 $\pm$ 5.015** | 5.008 $\pm$ 1.309## | 10.292 $\pm$ 0.098# | 7.498 $\pm$ 0.627#   | 24.776 $\pm$ 4.289# |
| Propionic acid  | 5.984 $\pm$ 2.027  | 1.054 $\pm$ 0.336*   | 0.517 $\pm$ 0.281#  | 0.340 $\pm$ 0.019#  | 0.406 $\pm$ 0.180#   | 0.667 $\pm$ 0.477   |
| Isobutyric acid | 0.057 $\pm$ 0.046  | 0.035 $\pm$ 0.004    | ND                  | 0.015 $\pm$ 0.001## | 0.013 $\pm$ 0.005### | ND                  |
| Butyric acid    | 0.566 $\pm$ 0.115  | 0.040 $\pm$ 0.004**  | 0.032 $\pm$ 0.019   | 0.015 $\pm$ 0.002## | 0.169 $\pm$ 0.130    | 0.019 $\pm$ 0.012#  |
| Isovaleric acid | 0.082 $\pm$ 0.042  | 0.032 $\pm$ 0.002    | 0.019 $\pm$ 0.003## | 0.030 $\pm$ 0.012   | 0.028 $\pm$ 0.005    | 0.028 $\pm$ 0.001   |
| Valeric acid    | 0.056 $\pm$ 0.017  | 0.007 $\pm$ 0.001*   | 0.006 $\pm$ 0.001   | 0.006 $\pm$ 0.004   | 0.026 $\pm$ 0.032    | 0.005 $\pm$ 0.003   |
| Caproic acid    | 0.065 $\pm$ 0.026  | 0.021 $\pm$ 0.001*   | 0.008 $\pm$ 0.002## | 0.016 $\pm$ 0.001#  | 0.011 $\pm$ 0.003#   | 0.015 $\pm$ 0.007   |

Values were presented as means  $\pm$  SD (n=10). ND: not detected. \* $p$ <0.05, \*\* $p$ <0.01 compared to

CD group, # $p$ <0.05, ## $p$ <0.01, ### $p$ <0.001 compared to HFD group.
